# Supplementary material
Source: publisher figshare collection journal article supplement (https://karger.figshare.com/articles/dataset/_/5121748)
Supplement: Supplementary file 1 [file 1]

**Table 1.** BAC clones

| Clone name   | Chromosome location         | Genes              |
|--------------|-----------------------------|--------------------|
| RP11-76D17   | chr2:14,578,555–14,758,698  | <i>FAM84A</i>      |
| RP11-163G14  | chr2:14,523,320–14,693,212  | <i>FAM84A</i>      |
| RP11-832L20  | chr2:15,224,381–15,427,182  | <i>NAG</i>         |
| RP11-422A6   | chr2:15,598,791–15,735,658  | <i>DDX1</i>        |
| RP11-480N14  | chr2:15,958,001–16,125,748  | <i>MYCN</i>        |
| RP11-369M18  | chr2:16,567,320–16,777,162  | <i>FAM49A</i>      |
| RP11-1152L17 | chr2:17,535,078–17,772,286  | <i>VSNL1</i>       |
| RP11-1031P4  | chr18:42,010,266–42,184,163 | <i>C18orf25</i>    |
| RP11-594A17  | chr18:44,137,938–44,305,300 | none               |
| RP11-229B6   | chr18:45,697,171–45,864,397 | <i>MYO5B</i>       |
| RP11-624I21  | chr6:49,742,298–49,789,242  | <i>PKG2/CRISP2</i> |

**Table 2.** Integrated SKY/mBAND karyotypes

| Cell line | SKY/mBAND composite karyotypes                                                                                                                                                                                                                                                                                                                                                                                                                                                                           |
|-----------|----------------------------------------------------------------------------------------------------------------------------------------------------------------------------------------------------------------------------------------------------------------------------------------------------------------------------------------------------------------------------------------------------------------------------------------------------------------------------------------------------------|
| LAN5      | Clone 1: (10/20 cells)<br>46,XY,der(1)t(1;17)(p33;q21.2),del(6)(q21),der(8)t(7;8)(?q32.1*;p23.3),9~43 dmin<br>Clone 2: (10/10 cells)<br>46,XY,der(1)t(1;17)(p33;q21.2),del(6)(q21),9~43 dmin                                                                                                                                                                                                                                                                                                             |
| GOTO      | 44,X?Y,der(1)t(1;2)(p32;hsr2p24pter),der(2)t(2;15)(p23;q?),del(4)(q13.1q13.3),dup(5)(q14q21),+der(7)(8?→8?::15q?<br>→q11::7p11→7qter),der(8)(8pter→8q23::2p22→2p23::17q22→q25::8q24→8qter),der(9)t(9;15)(pter;q26),<br>del(11)(p?),del(11q23),del(13)q22),-14,der(14)t(6;14)(q11;p11),-15,der(15)<br>(16pter→16qter::14qter→14q11::15p11→qter),-16,del(20)(p11.2?),der(21)t(2;21)(?;?q21),der(21)t(8;21)(?;?)                                                                                            |
| Y79       | 46,X,X,+der(1)(hsr18q21.1,hsr18q23::hsr2p24→2p16→2p12::1p11→1qter),der(2)(11?→11?::2?q36→2?q24::2p?22→<br>2qter::11?→11?),del(3)(q27),der(4)t(4;17)(p16;q21.3),del(5)(p13.2),der(6)t(6;21)(q24;q21),der(6)(7q?31→7q?3::6pter<br>→6qter),del(7)(q11),?pinv(8)(p11q13),der(9)t(9;13)(p11;q11),del(10)(?p10?p12),der(11)t(8;11)(q13;p15),der(12)t(X;1<br>2)(q21;q24),der(12)t(7;12)(q11;q24),der(13)t(13;13)(p10;q13)×2,dup(15)(?q15?q22)×2,del(16)(?q12?q13),der(20)t(?9;<br>20)(?p11;q13),inv(21)(q11q22) |
| IMR32     | Clone 1: (7/20 cells)<br>47~48,XY,+1,der(1)(hsr2p24,2p14::17q21.2~17q25.3::1p33→1q44)×2,der(16)t(15;16)(q15.2;q22),<br>der(19)t(6;19)(?;q13.43)<br>Clone 2: (7/20 cells)<br>49,XY,+dup(1)(p32.3p36.3),der(1)(hsr2p24,2p14::17q21.2→17q25.3::1p33→1q44)×2,+6,+12,<br>der(16)t(15;16)(q15.2;q22)                                                                                                                                                                                                           |

**Table 3.** Selected genes analyzed by aCGH in GOTO

| Region | Basepair location           | Genes                               |
|--------|-----------------------------|-------------------------------------|
| Peak 1 | chr2:5,750,250–5,758,968    | <i>SOX11</i>                        |
| Peak 2 | chr2:10,180,186–10,505,221  | <i>RRM2, HPCAL1, ODC1</i>           |
| Peak 3 | chr2:15,999,497–16,004,580  | <i>MYCN</i>                         |
| Peak 4 | chr2:20,734,731–151,032,955 | <i>FLJ21820, GDF7, HS1BP3, RHO8</i> |

**Table 4.** Selected genes analyzed by aCGH in Y79

| Region | Basepair location           | Genes                                                   |
|--------|-----------------------------|---------------------------------------------------------|
| Peak 1 | chr18:41,817,500–42,435,624 | <i>PSTPIP2, ATP5A1, CCDC5, C18orf25, RNF165, LOXHD1</i> |
| Peak 2 | chr18:43,821,492–44,643,582 | none                                                    |
| Peak 3 | chr18:45,563,872–46,046,863 | <i>ACAA2, CCDC11</i>                                    |
| Peak 4 | chr18:72,336,465–72,534,580 | <i>FLJ44313, FLJ44881</i>                               |
