# Supplementary material
Source: publisher figshare collection journal article supplement (https://karger.figshare.com/articles/dataset/_/5121748)
Supplement: Supplementary file 2 [file 1]

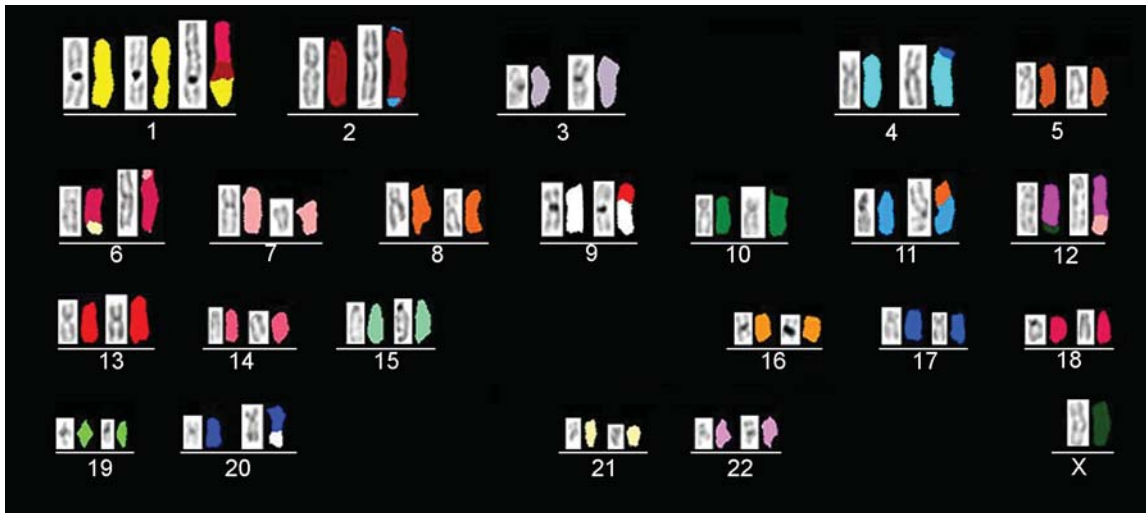

Supplementary Figure 1. Spectral Karyotyping (SKY) analysis of Y79. Shown are the inverted DAPI and pseudo- or SKY-classified karyotype following analysis. This near diploid karyotype shows relatively simple unbalanced translocations. The hsr located on the der(1) was SKY classified as a complex translocation involving chromosomes 18 (fuchsia), 2 (red) and 1 (yellow). However, the subsequent FISH confirmed the region classified as chromosome 18 was found to contain material from the 2p24 region in addition to material from chromosome 18.

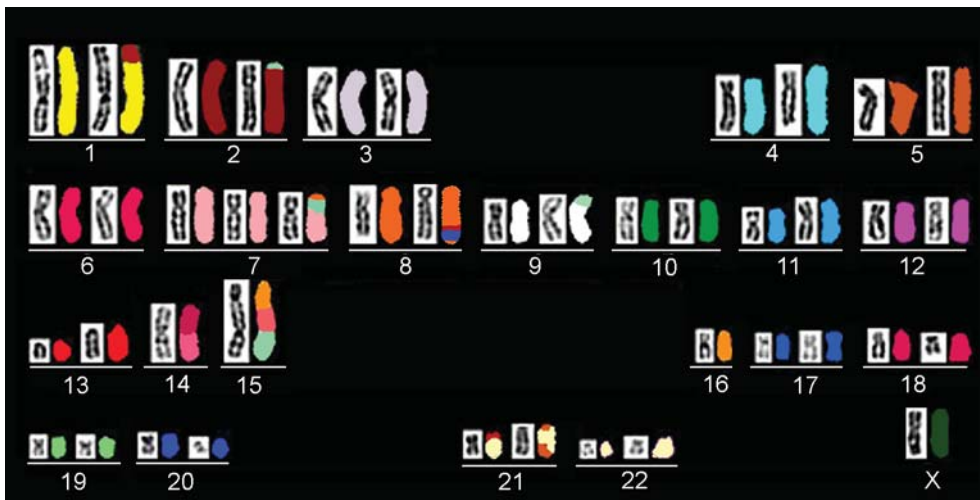

Supplementary Figure 2. Spectral Karyotyping (SKY) analysis of GOTO. Shown are the inverted DAPI and pseudo- or SKY-classified karyotype following analysis. This near diploid karyotype shows a number of complex and simple unbalanced translocations. The amplification of MYCN is located on the hsr location on the der(1).

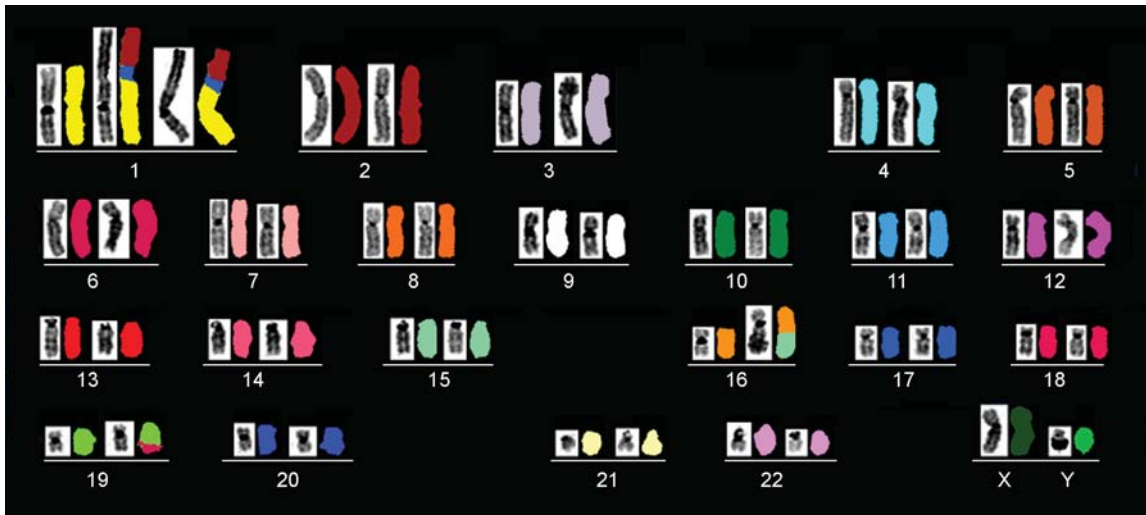

Supplementary Figure 3. Spectral Karyotyping (SKY) analysis of IMR32. Shown are the inverted DAPI and pseudo- or SKY-classified karyotype following analysis. This near diploid karyotype shows relatively few structural rearrangements. Amplification of the 2p24 locus, in addition to 2p14, is found on the paired der(1) which involves a complex rearrangement of chromosomes 1 (yellow), 17 (blue) and 2 (red).

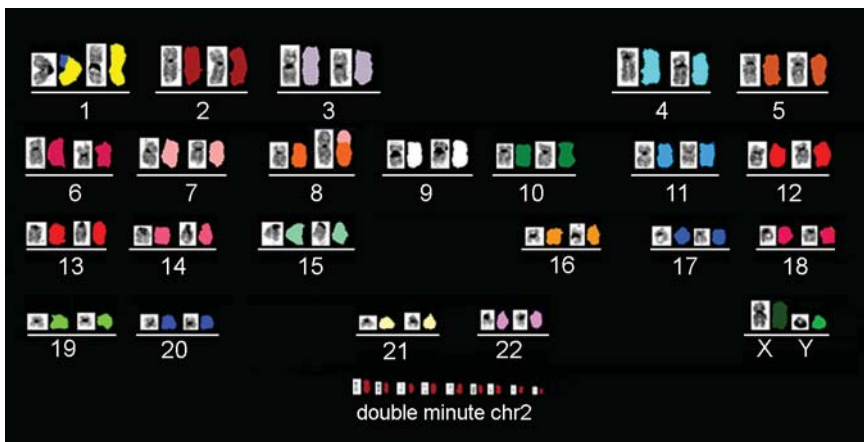

Supplementary Figure 4. Spectral Karyotyping (SKY) analysis of LAN5. Shown are the inverted DAPI and pseudo- or SKY-classified karyotype following analysis. This mainly diploid karyotype shows the least structural rearrangements of the 4 cell lines shown. Amplification of the 2p24 region was identified by SKY by the classification of dmns as material derived from chromosome 2 (red).
